# Supplementary material for: Bioinspired pyrimidine-containing cationic polymers as effective nanocarriers for DNA and protein delivery
Source: Royal Society of Chemistry journal article supplement (doi:10.1039/c9tb02528f), 2020-01-01
Supplement: c9tb02528f1.pdf [file c9tb02528f1.pdf]

## Supporting Information

### **Bioinspired pyrimidine-contained cationic polymers as effective nano-carriers for DNA and protein delivery**

Ya-Ping Xiao, Ji Zhang\*, Yan-Hong Liu, Zheng Huang, Yu Guo and Xiao-Qi Yu\*

*Key Laboratory of Green Chemistry and Technology (Ministry of Education), College of Chemistry, Sichuan University, Chengdu 610064, P. R. China*

\*Corresponding authors: [jzhang@scu.edu.cn](mailto:jzhang@scu.edu.cn) (J. Zhang); [xqyu@scu.edu.cn](mailto:xqyu@scu.edu.cn) (X.-Q. Yu).

自动缩放色谱图

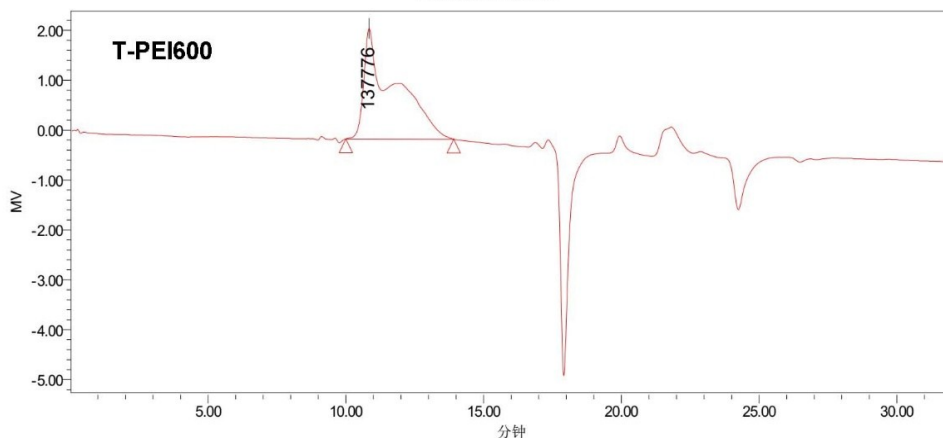

GPC 结果

| 分布名 | Mn (道尔顿) | Mw (道尔顿) | MP     | Mz (道尔顿) | Mz+1 (道尔顿) | 多分散性     | MW 标记 1 (道尔顿) | MW 标记 2 (道尔顿) |
|-----|----------|----------|--------|----------|------------|----------|---------------|---------------|
| 1   | 34346    | 74892    | 137776 | 126882   | 168743     | 2.180528 |               |               |

自动缩放色谱图

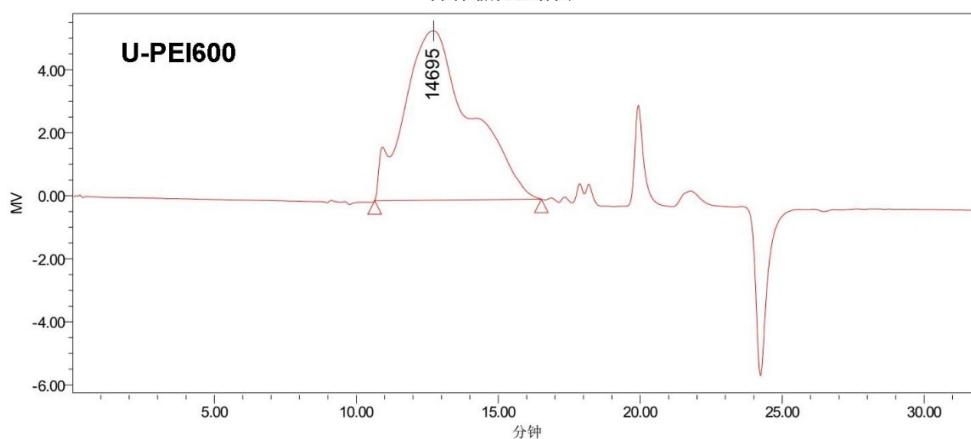

GPC 结果

| 分布名 | Mn (道尔顿) | Mw (道尔顿) | MP    | Mz (道尔顿) | Mz+1 (道尔顿) | 多分散性     | MW 标记 1 (道尔顿) | MW 标记 2 (道尔顿) |
|-----|----------|----------|-------|----------|------------|----------|---------------|---------------|
| 1   | 7904     | 21127    | 14695 | 52888    | 89430      | 2.673100 |               |               |

自动缩放色谱图

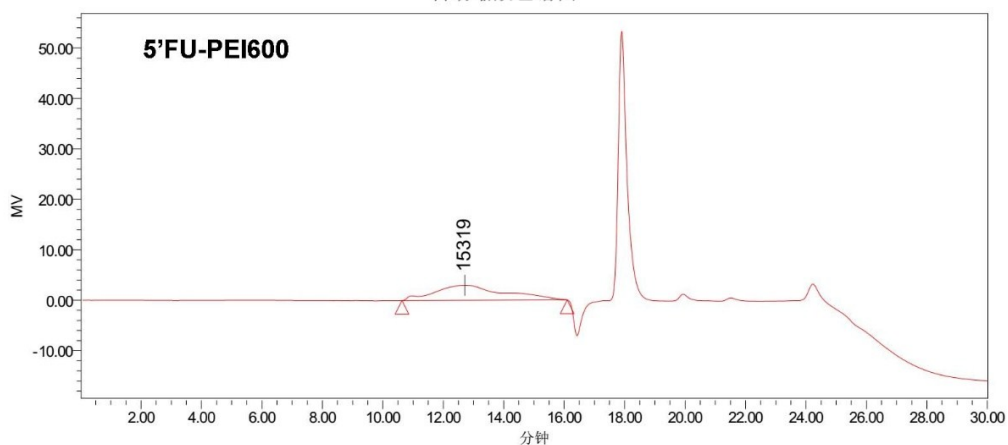

GPC 结果

| 分布名 | Mn (道尔顿) | Mw (道尔顿) | MP    | Mz (道尔顿) | Mz+1 (道尔顿) | 多分散性     | MW 标记 1 (道尔顿) | MW 标记 2 (道尔顿) |
|-----|----------|----------|-------|----------|------------|----------|---------------|---------------|
| 1   | 8052     | 21343    | 15319 | 51450    | 84830      | 2.650496 |               |               |

Fig. S1. GPC results of the studied polymers.

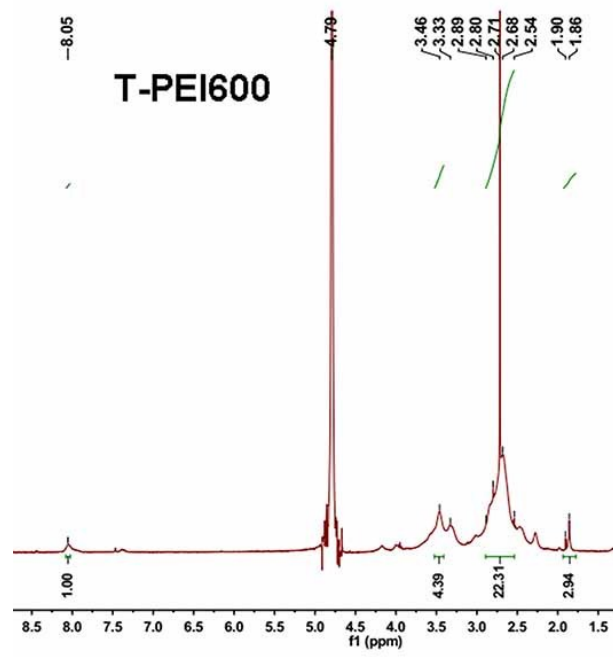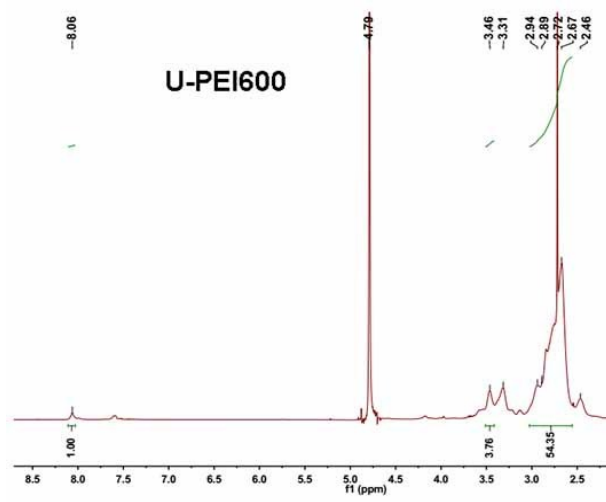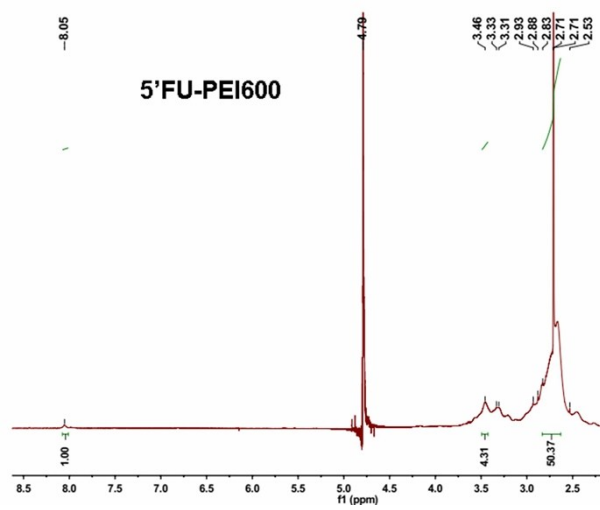

**Fig. S2.**  $^1\text{H-NMR}$  spectra of the polymers.

自动缩放色谱图

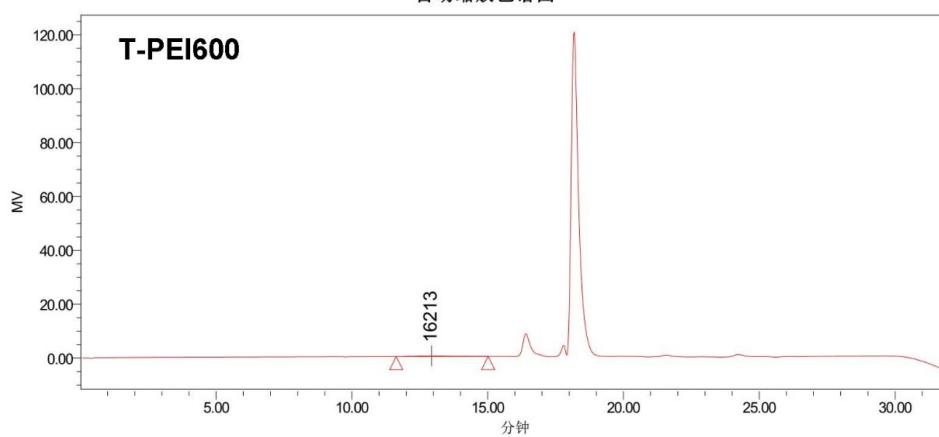

GPC 结果

| 分布名 | Mn (道尔顿) | Mw (道尔顿) | MP    | Mz (道尔顿) | Mz+1 (道尔顿) | 多分散性     | MW 标记 1 (道尔顿) | MW 标记 2 (道尔顿) |
|-----|----------|----------|-------|----------|------------|----------|---------------|---------------|
| 1   | 12779    | 15131    | 16213 | 16712    | 17778      | 1.184077 |               |               |

自动缩放色谱图

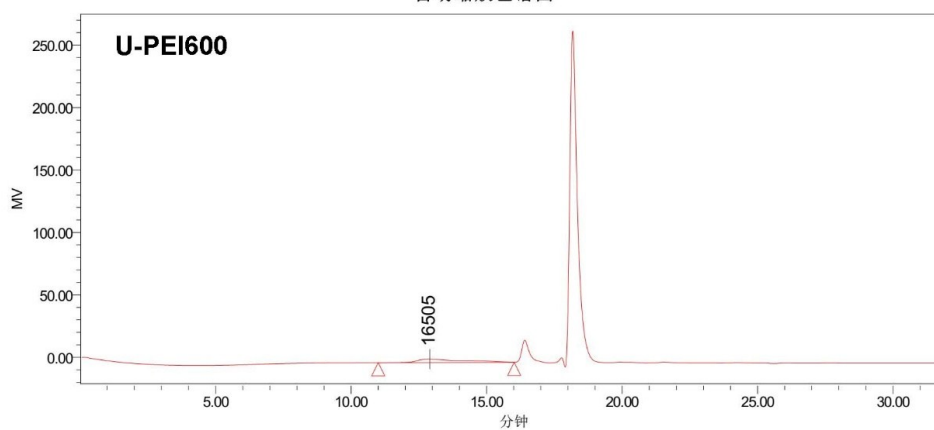

GPC 结果

| 分布名 | Mn (道尔顿) | Mw (道尔顿) | MP    | Mz (道尔顿) | Mz+1 (道尔顿) | 多分散性     | MW 标记 1 (道尔顿) | MW 标记 2 (道尔顿) |
|-----|----------|----------|-------|----------|------------|----------|---------------|---------------|
| 1   | 6629     | 1118     | 16505 | 14627    | 16500      | 1.686684 |               |               |

自动缩放色谱图

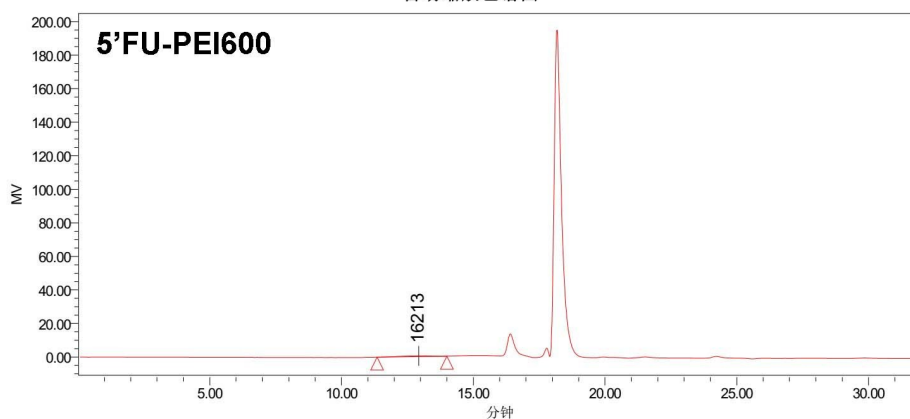

GPC 结果

| 分布名 | Mn (道尔顿) | Mw (道尔顿) | MP    | Mz (道尔顿) | Mz+1 (道尔顿) | 多分散性     | MW 标记 1 (道尔顿) | MW 标记 2 (道尔顿) |
|-----|----------|----------|-------|----------|------------|----------|---------------|---------------|
| 1   | 16793    | 17665    | 16213 | 18415    | 19038      | 1.051932 |               |               |

Fig. S3. GPC results of the studied polymers after incubation in PBS for 24 h.

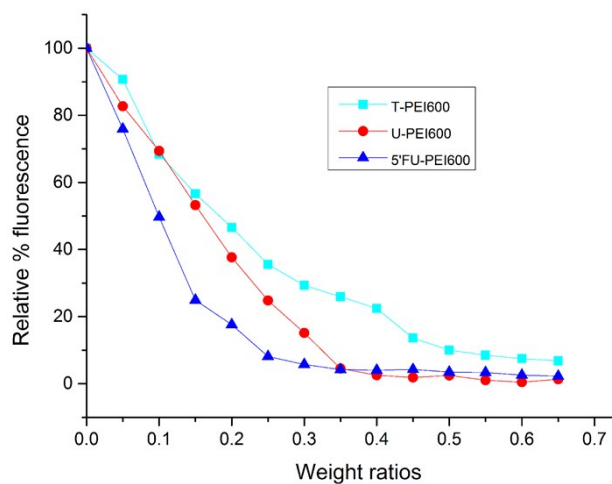

**Fig. S4.** Fluorescent quenching assay by the addition of polymers to EB / DNA solution.

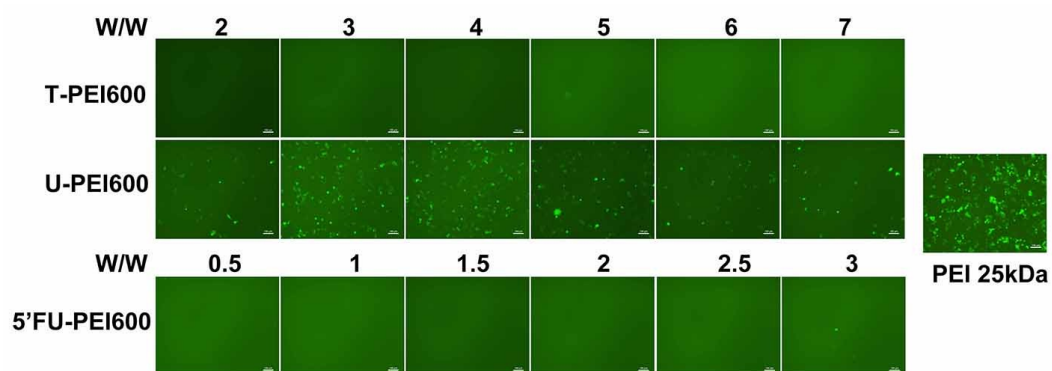

**Fig. S5.** EGFP gene transfection in HeLa cells. Scar bar is 100  $\mu$ m.

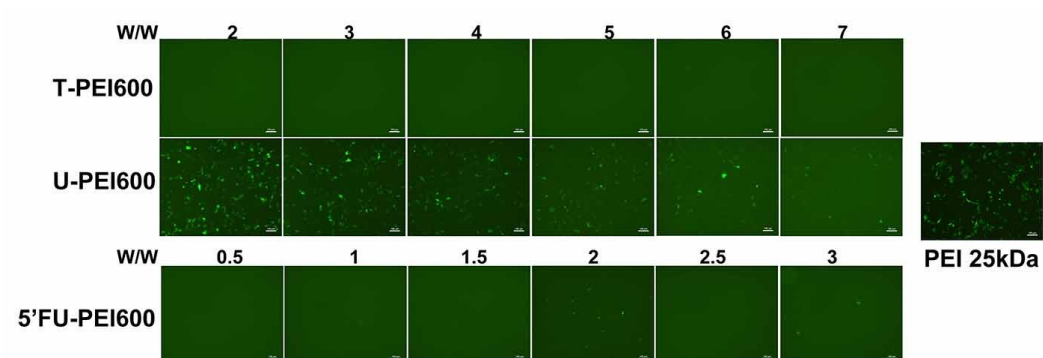

**Fig. S6.** EGFP gene transfection in 7702 cells. Scar bar is 100  $\mu$ m.

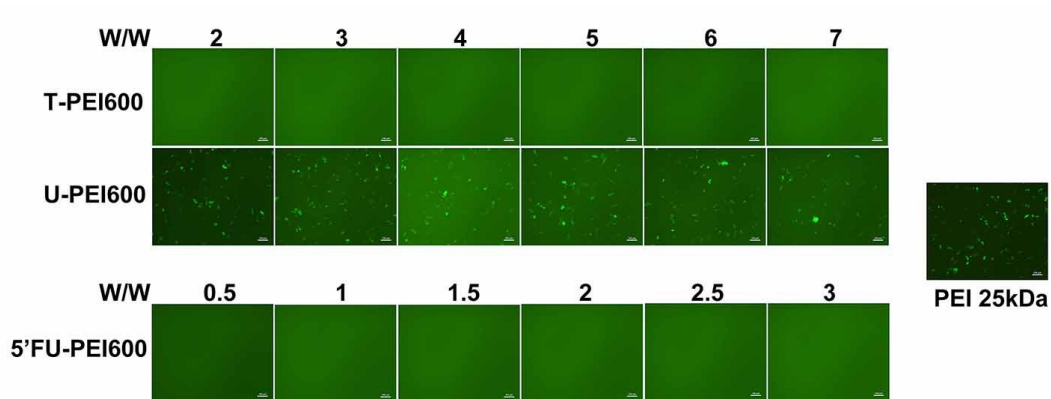

**Fig. S7.** EGFP gene transfection in HepG2 cells. Scar bar is 100  $\mu$ m.

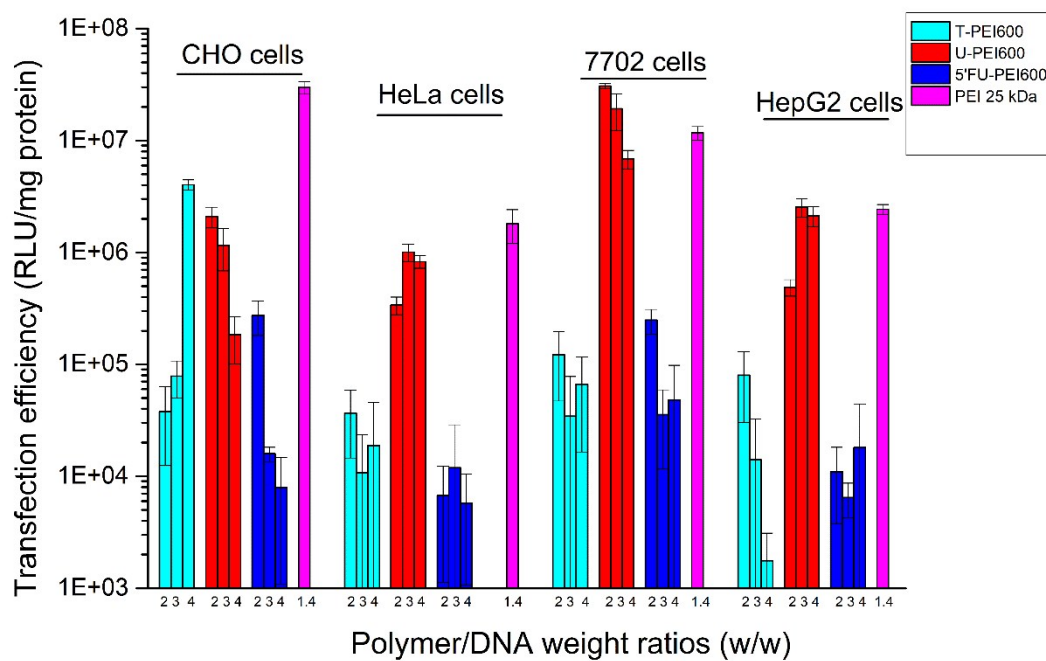

**Fig. S8.** Luciferase gene expression transfected by polyplexes at different mass ratios in comparison with 25 kDa bPEI (w/w=1.4) in the presence of 10% serum. Data represent mean  $\pm$  SD (n = 3).

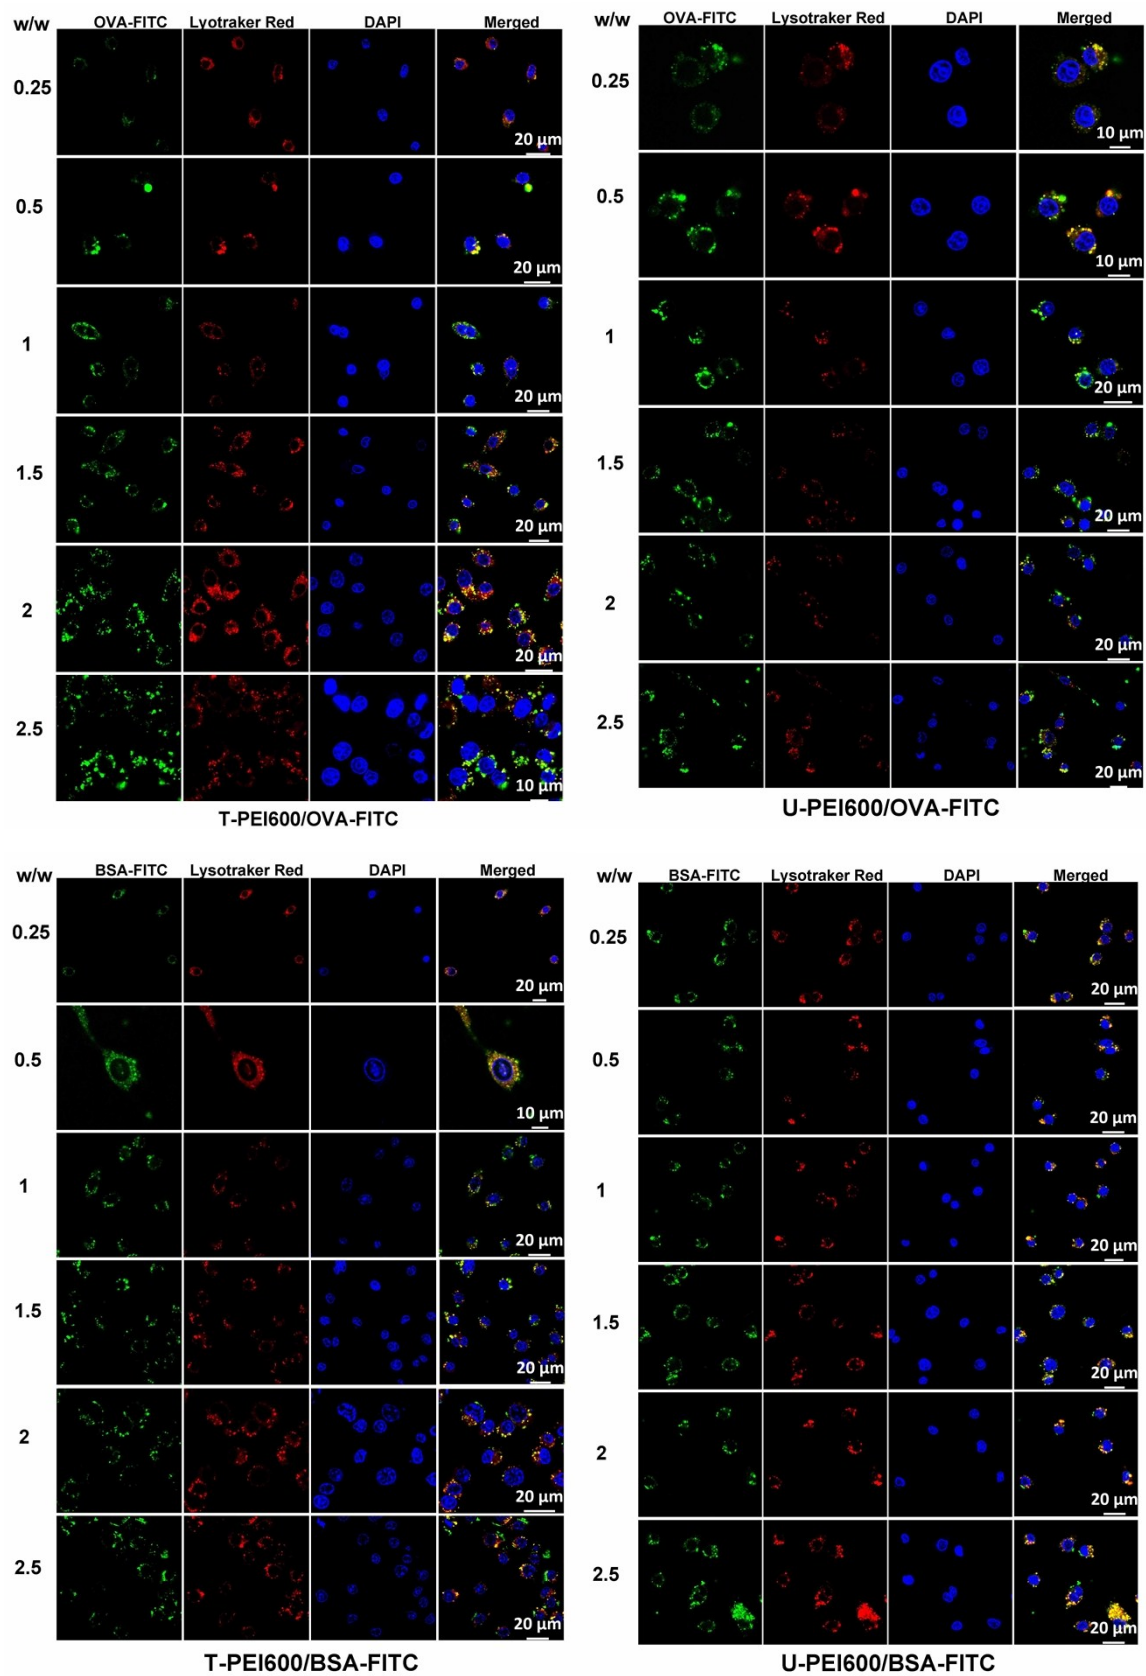

**Fig. S9.** Intracellular distribution of FITC-labeled protein (green) complexes on Raw 264.7 cells at different weight ratio for 4 h in the absence of 10% serum. The nuclei were stained with DAPI (blue), and the endosome/lysosomes were stained with LysoTracker Red (red). Scar bar is 20 μm.



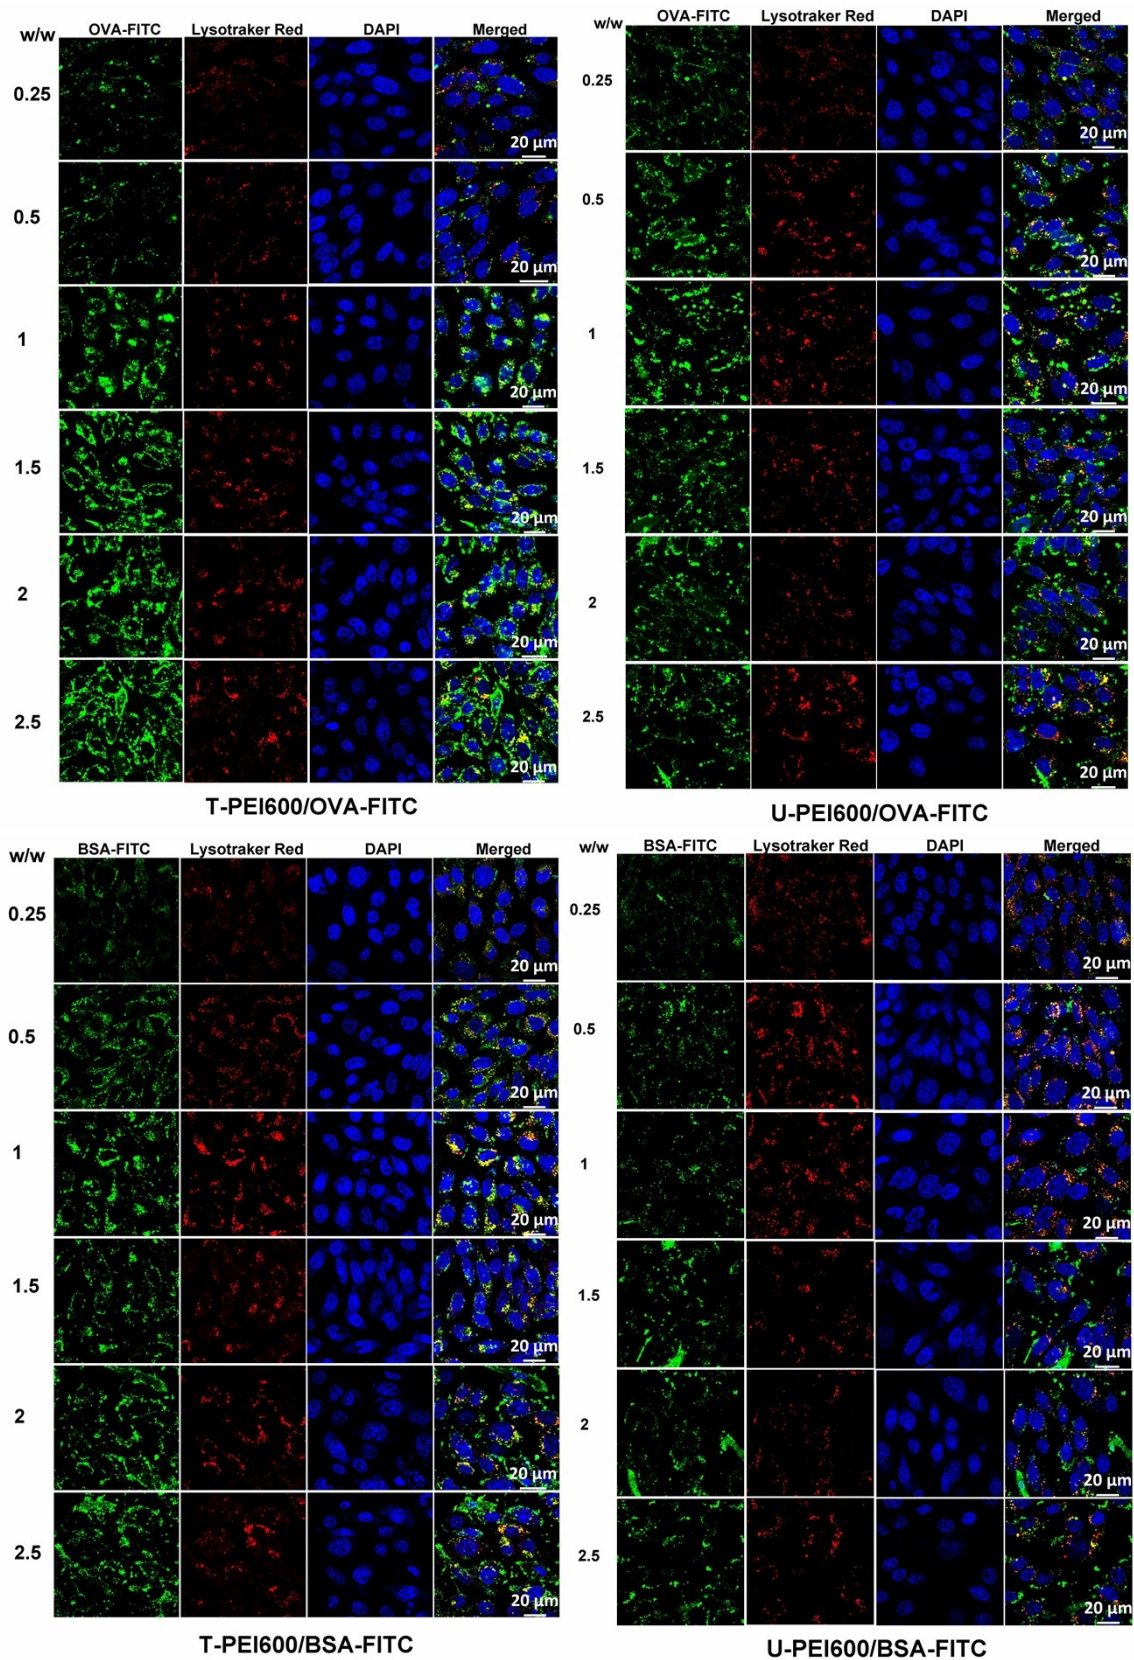

**Fig. S10.** Intracellular distribution of FITC-labeled protein (green) complexes on CHO cells at different weight ratio for 4 h in the absence of 10% serum. The nuclei were stained with DAPI (blue), and the endosome/lysosomes were stained with LysoTracker Red (red). Scar bar is 20 μm.



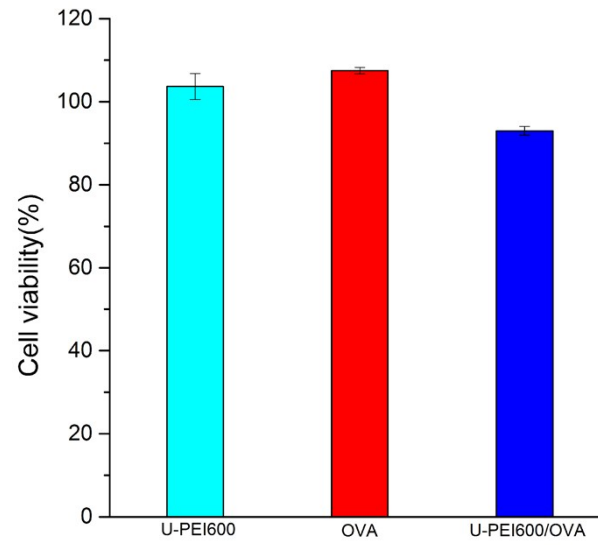

**Fig. S11.** The viability of Raw 264.7 cells treated with U-PEI600, OVA or U-PEI600/OVA complexes at mass ratio of 1. Data are presented as mean  $\pm$  SD (n = 3).
